1 **Augmenting electronic health record data with social and environmental determinant of**  
2 **health measures to understand regional factors associated with asthma exacerbations**

3 Alana Schreibman<sup>1</sup>, Kimberly Lactaoen<sup>1</sup>, Jaehyun Joo<sup>1</sup>, Patrick K. Gleeson<sup>2</sup>, Gary E.

4 Weissman<sup>1,2</sup>, Andrea J. Apter<sup>2</sup>, Rebecca A. Hubbard<sup>3</sup>, Blanca E. Himes<sup>1</sup>

5

6 <sup>1</sup>Department of Biostatistics, Epidemiology and Informatics, Perelman School of Medicine,

7 University of Pennsylvania, Philadelphia, PA 19104

8 <sup>2</sup>Division of Pulmonary, Allergy and Critical Care Medicine, Perelman School of Medicine,

9 University of Pennsylvania, Philadelphia, PA 19104

10 <sup>3</sup>Department of Biostatistics, School of Public Health, Brown University, Providence, RI 02912

11

12 Corresponding author:

13 Blanca E Himes, PhD

14 402 Blockley Hall

15 423 Guardian Drive

16 Philadelphia, PA 19104

17 Phone: (215) 573-3282

18 Email: [bhimes@pennmedicine.upenn.edu](mailto:bhimes@pennmedicine.upenn.edu)

## 19 **Abstract**

20 Electronic health records (EHRs) provide rich data for diverse populations but often lack  
21 information on social and environmental determinants of health (SEDH) that are important for  
22 the study of complex conditions such as asthma, a chronic inflammatory lung disease. We  
23 integrated EHR data with seven SEDH datasets to conduct a retrospective cohort study of 6,656  
24 adults with asthma. Using Penn Medicine encounter data from January 1, 2017 to December 31,  
25 2020, we identified individual-level and spatially-varying factors associated with asthma  
26 exacerbations. Black race and prescription of an inhaled corticosteroid were strong risk factors  
27 for asthma exacerbations according to a logistic regression model of individual-level risk. A  
28 spatial generalized additive model (GAM) identified a hotspot of increased exacerbation risk  
29 (mean OR = 1.41, SD 0.14,  $p < 0.001$ ), and inclusion of EHR-derived variables in the model  
30 attenuated the spatial variance in exacerbation odds by 34.0%, while additionally adjusting for  
31 the SEDH variables attenuated the spatial variance in exacerbation odds by 66.9%. Additional  
32 spatial GAMs adjusted one variable at a time revealed that neighborhood deprivation (OR =  
33 1.05, 95% CI: 1.03, 1.07), Black race (OR = 1.66, 95% CI: 1.44, 1.91), and Medicaid health  
34 insurance (OR = 1.30, 95% CI: 1.15, 1.46) contributed most to the spatial variation in  
35 exacerbation odds. In spatial GAMs stratified by race, adjusting for neighborhood deprivation  
36 and health insurance type did not change the spatial distribution of exacerbation odds. Thus,  
37 while some EHR-derived and SEDH variables explained a large proportion of the spatial  
38 variance in asthma exacerbations across Philadelphia, a more detailed understanding of SEDH  
39 variables that vary by race is necessary to address asthma disparities. More broadly, our findings  
40 demonstrate how integration of information on SEDH with EHR data can improve understanding  
41 of the combination of risk factors that contribute to complex diseases.

42 **Author summary**

43 Electronic health records constitute an important source of data for understanding the health of  
44 large and diverse real-world populations, however, they do not routinely capture socioeconomic  
45 and environmental factors known to affect health outcomes. We show how electronic health  
46 record data can be augmented to include individual measures of air pollution exposures,  
47 neighborhood socioeconomic status, and the natural and built environment using patients’  
48 residential addresses to study asthma exacerbations, episodes of worsening disease that remain a  
49 major public health challenge in the United States. We found that on an individual patient-level,  
50 Black race and prescription of an inhaled corticosteroid were the factors most strongly associated  
51 with asthma exacerbations. In contrast, neighborhood deprivation, race, and health insurance  
52 type accounted for the most spatial variation in exacerbation risk across Philadelphia. Our  
53 findings provide insight into factors that contribute to asthma disparities in our region and  
54 present a framework for future efforts to expand the scope of electronic health record data.

55

## 56 **Introduction**

57 Electronic health records (EHRs) are a source of rich patient-level data for large and diverse  
58 populations that can be used for research due to their widespread availability [1]. However, EHR  
59 data often contain incomplete or low-quality measures of social and environmental determinants  
60 of health (SEDH), limiting their utility for the study of complex diseases [2]. Recent efforts to  
61 address this limitation have included developing methodologies to integrate external data on the  
62 physical, built, and social environment via linkage with patient addresses [3–5], with high-  
63 resolution geospatial datasets providing the closest estimate of individual exposures [6].  
64 Integrated EHR and SEDH datasets can be used to understand both individual-level outcomes  
65 and patterns of risk across a spatial region, thereby providing insights for both precision  
66 medicine and precision public health efforts. Because many environmental exposures pose a  
67 greater risk to select groups of people, integrating external information on SEDH with EHR data  
68 is also helpful to address health disparities according to race, ethnicity, and socioeconomic status.

69       Asthma, a chronic disease that is characterized by inflammation and reversible narrowing  
70 of the airways, affects over 25 million people or approximately 8% of the United States  
71 population [7]. Racial and ethnic disparities in its morbidity and mortality are well known, and  
72 those living in poverty are also more likely to have asthma [7–11]. The clinical goals of asthma  
73 management are to control patients' symptoms and minimize long-term risk of lung function  
74 decline [12]. This includes preventing asthma exacerbations, episodes of worsening disease  
75 which require treatment with systemic steroids [13]. However, despite guideline-directed clinical  
76 management, asthma exacerbations remain common, contributing to asthma-related morbidity  
77 and mortality as well as higher health care costs and utilization [14,15]. Risk factors for asthma  
78 exacerbations in adults include female sex [16], obesity [17], current or past smoking [18],

79 comorbid allergic rhinitis or chronic obstructive pulmonary disease (COPD) [17,19], and a  
80 history of previous exacerbations [20]. Observational studies have also found independent  
81 associations between asthma exacerbations and exposure to particulate matter (PM), gaseous air  
82 pollutants, and to mixtures of pollutants such as traffic-related air pollution (TRAP) [21].  
83 Similarly, associations between asthma exacerbations and living in poverty [22], substandard  
84 housing conditions, such as the presence of mold and pests [23,24], and neighborhood  
85 “greenness” [25,26] have been documented.

86         Because asthma exacerbations result from complex interactions among various  
87 biological, social, and environmental factors that vary across individuals and geographically,  
88 creating generalizable models of exacerbations remains an unachieved goal. Further, because in  
89 the United States there is a high correlation between minoritized race or ethnicity, poverty, and  
90 harmful environmental exposures, disentangling relationships among key variables is difficult  
91 [9,27]. Approaches that model many asthma-related variables in specific regions may lead to the  
92 identification of actionable strategies to reduce exacerbations locally, and using EHR data to  
93 create these models has the advantage of providing health information for the specific catchment  
94 region served by a given healthcare system. Few studies have linked EHRs with a diverse set of  
95 SEDH variables to study asthma exacerbations using patient-level data [28–30], and to our  
96 knowledge, none have used geospatial analysis techniques to understand the contribution of  
97 these factors to the spatial distribution of exacerbation risk. Here, we show how EHR data can be  
98 extended to include individualized measures of air pollution exposures, socioeconomic status  
99 indices, and measures of the natural and built environment to identify local factors associated  
100 with asthma exacerbation risk.

## 101 **Methods**

102

103 A retrospective cohort analysis was performed using de-identified EHR data from Penn  
104 Medicine, a large health system that serves the greater Philadelphia area, from encounters dated  
105 1/1/2017-12/31/2020. An overview of our study design is shown in Fig 1.

106

#### 107 Ethics statement

108 Our study was approved by the University of Pennsylvania Institutional Review Board (IRB)  
109 under protocol number 824789. Formal consent was not obtained, as a waiver of HIPAA  
110 Authorization was granted for the conduct of this research.

111

#### 112 Study population

113 Patient-level encounter data was obtained for adults (i.e. age  $\geq$  18 years) who had at least one  
114 encounter with an International Classification of Diseases (ICD)-10 code for asthma (J45\*) and  
115 who were prescribed a short-acting  $\beta_2$ -agonist (SABA) (S1 Table). The most recent residential  
116 address for each patient was obtained and geocoded using previously described methods [3].  
117 Demographic, comorbidity, and medication data for encounters during the study period was  
118 extracted and used to compute several variables, hereafter referred to as “EHR-derived  
119 variables.” These included: age at first encounter, sex, race, ethnicity, body mass index (BMI),  
120 health insurance type, smoking status, chronic obstructive pulmonary disease (COPD), allergic  
121 rhinitis, a modified Elixhauser score [31], inhaled corticosteroid (ICS) prescription, and years  
122 followed (defined as the number of years between first and last encounter). Additional details,  
123 including inclusion and exclusion criteria and definitions of the EHR-derived variables, are  
124 provided in S1 Text.

125

126 Outcome

127 Asthma exacerbations were defined as encounters with an oral corticosteroid (OCS) prescription  
128 (S1 Table) and either 1) a primary asthma diagnosis code (ICD-10, J45\*) for encounters with  
129 primary diagnosis codes listed or 2) a nonprimary asthma ICD-10 code for encounters without a  
130 primary diagnosis listed but only one or two ICD-10 codes listed. A count of exacerbations  
131 during the study period was computed for each patient.

132

133 SEDH data

134 Seven external datasets were integrated with our EHR dataset via linkage with patient geocodes,  
135 creating variables that are hereafter referred to as “SEDH variables.” Additional details on data  
136 processing are reported in S1 Text, and dataset sources and spatiotemporal dimensions are  
137 summarized in S2 Table. All processed SEDH data is available in Sensor-based Analysis of  
138 Pollution in the Philadelphia Region with Information on Neighborhoods and the Environment  
139 (SAPPHIRINE), a web application that integrates spatially distributed high-resolution social and  
140 environmental data in the greater Philadelphia region to facilitate the conduct of local health  
141 studies [32].

142

143 *Air pollution exposures*

144 Average pollutant exposures were assigned to each patient using high-resolution (~1x1 km<sup>2</sup>)  
145 geophysical model estimates. 2017-2019 NO<sub>2</sub> estimates (in parts per billion by volume, or ppbv)  
146 and 2017-2020 PM<sub>2.5</sub> estimates (in µg/m<sup>3</sup>) were downloaded from resources reported in Cooper  
147 et al. and van Donkelaar et al., respectively, temporally averaged, and linked to the study cohort  
148 using bilinear interpolation [33,34]. Exposure to other toxic airborne chemicals from point

149 sources was estimated using the EPA Toxics Release Inventory (TRI) [35]. Total toxic air release  
150 exposure by patient was computed as the sum of toxic releases (in kilograms) over the study  
151 period within a 1-km circular buffer of each patient's residential address. Exposure to air  
152 pollution from mobile sources was estimated as the sum of the daily vehicle distance traveled  
153 (DVDT), a metric computed using traffic data published by the Pennsylvania Department of  
154 Transportation, within a 300-m circular buffer [36].

155

#### 156 *Neighborhood socioeconomic environment*

157 Socioeconomic disadvantage for each person was summarized as the Area Deprivation Index  
158 (ADI), a validated index computed for each Census block group based on several ACS variables  
159 [37]. A higher ADI score indicates greater disadvantage. 2018 ADI data was extracted from the  
160 Neighborhood Atlas and was assigned to each patient by block group [38].

161

#### 162 *Built and natural environment*

163 Asthma-related housing code violation data (i.e. pests, water damage, and indoor air  
164 contamination) was obtained from a Philadelphia Department of Licenses and Inspections  
165 dataset reported by OpenDataPhilly (S3 Table) [39]. For each block group, the number of  
166 violations during the study period per 100 people (based on the 2019 ACS population estimates)  
167 was computed and assigned to each patient. Vegetation density was summarized as the  
168 normalized difference vegetation index (NDVI), an index with values ranging from -1.0 to 1.0  
169 where higher positive values represent higher vegetation density. NDVI was computed in Google  
170 Earth Engine using surface reflectance images from the Landsat 8 satellite during the study  
171 period and assigned to each patient as the mean value within a 300-m circular buffer [40].



172

173 Statistical analysis

174 Analyses were conducted in R 4.2 [41].

175

176 *Study area*

177 To minimize bias in our geospatial analyses introduced by uneven spatial density across the Penn

178 Medicine catchment area, we restricted our study region to spatial areas in which the geospatial

179 representativeness of our EHR cohort was adequate compared to the underlying population.

180 Following methods described in Xie et al. [42], we computed a spatial representation ratio

181 (SRR), defined as the ratio between the proportion of our EHR cohort living in each census

182 block group and the proportion of the Philadelphia population living in that block group, as

183 reported by the 2019 American Community Survey (ACS). We defined our study region as

184 contiguous census tracts (i.e. adjacent or separated by a non-residential area such as a park) with

185 a mean SRR of 0.5 or greater. Only patients who resided in this study region were included in

186 analyses.

187

188 *Modeling individual-level risk factors*

189 Chi-squared and Kruskal-Wallis rank sum tests were used in bivariate analyses to assess

190 associations between patient characteristics and asthma exacerbation level (i.e. 0, 1-2, 3-4, 5+)

191 during the study period, and to compare the characteristics of complete cases to individuals with

192 missing data. To identify patient-level factors associated with asthma exacerbations, we fit

193 logistic regression models with asthma exacerbations as a binary case-control (0 vs >0) outcome.

194 This approach was chosen to match the dichotomous outcome used in spatial analyses. Logistic

195 regression models were initially adjusted for EHR-derived variables only, and then adjusted for  
196 both EHR-derived and SEDH variables (EHR & SEDH-adjusted). Years followed was included  
197 as a covariate in both models to account for variation in the length of available follow-up across  
198 patients. Model fit was assessed using the Akaike information criterion (AIC). We checked for  
199 multicollinearity by computing Pearson's correlation coefficients between all EHR and SEDH  
200 variables, while selecting White race and Private health insurance type as reference levels for the  
201 two nominal categorical variables, and we computed variance inflation factors (VIF) for all  
202 independent variables.

203

#### 204 *Sensitivity analysis for individual-level risk factors*

205 We conducted sensitivity analyses of individual-level risk factors by fitting negative binomial  
206 regression models with asthma exacerbations represented as a count outcome and comparing  
207 results to those of logistic regression models. The negative binomial regression models were  
208 adjusted first for EHR-derived variables only and then for EHR & SEDH variables, while  
209 including years followed as an offset in each model.

210

#### 211 *Modeling spatial risk factors*

212 To estimate local odds of exacerbation as a function of location, spatial generalized additive  
213 models (GAMs) were fit with a binary case-control outcome (0 vs >0 exacerbations) on a grid of  
214 points across the study region, using the R *MapGAM* package and previously described methods  
215 (S1 Text) [3,43]. Maps of spatial effect predictions were created for the smoothed spatial term of  
216 each model, where the spatial odds ratio (OR) at each point represented the ratio between the  
217 odds of exacerbation at that point and the median odds across all points. First, a univariable

218 model adjusted only for years followed, hereafter referred to as “unadjusted model”, was fit to  
219 identify hotspots and coldspots across the study region. Next, multivariable models adjusted for  
220 1) only EHR-derived variables and 2) EHR & SEDH variables were compared to the unadjusted  
221 model by computing the mean and standard deviation (SD) of the spatial ORs at points within  
222 any overlapping hotspots, and by computing the percent difference between the variance in ORs  
223 across the full study region in the adjusted models and the unadjusted model. To understand the  
224 contribution of individual variables to the observed spatial effects, we fit additional models  
225 adjusted for each EHR-derived or SEDH variable one variable at a time (all models were also  
226 adjusted for years followed) and computed the percent difference between the variance in ORs in  
227 these models and the unadjusted model. Model fit was assessed using the AIC.

228

### 229 *Stratified analysis*

230 We conducted a stratified analysis to further evaluate the association between race and asthma  
231 exacerbations. Chi-square and Wilcoxon rank sum tests were used to assess bivariate  
232 relationships between race and other variables. To test whether any EHR or SEDH variables that  
233 were correlated with race influenced spatial patterns of asthma exacerbation risk independently  
234 of race, spatial GAMs adjusted one variable at a time were fit on each race stratum using the  
235 same approach described above. Before fitting the models, SRR selection was repeated for each  
236 stratum to account for the uneven geographic distribution of race across the initial study region.

237

## 238 **Results**

239 Following selection of patients based on inclusion/exclusion criteria and spatial filtering (S1  
240 Fig), the retrospective study cohort consisted of 6,656 asthma patients, 2,329 of whom had one

241 or more exacerbations (Table 1), with residence in 249 census tracts in Philadelphia (S2 Fig).  
242 The spatial distribution of all processed SEDH datasets within the study region is shown in S3  
243 Fig. The EHR-derived variables years followed, age, race, BMI, health insurance type, smoking  
244 status, COPD, allergic rhinitis, Elixhauser comorbidity score, and ICS, as well as the SEDH  
245 variable ADI were the most significantly associated with exacerbations according to bivariate  
246 analyses ( $p < 0.001$ ) (Table 1). Patients with more exacerbations during the study period were  
247 followed for more years, more likely to be aged 35-54, of Black race, or class 2 or class 3 obese,  
248 and more likely to have Medicaid health insurance, a history of smoking, COPD, allergic rhinitis,  
249 higher Elixhauser comorbidity scores, an ICS prescription, or live in neighborhoods with higher  
250 ADI. The proportion of patients in the study cohort who were prescribed controller medications  
251 including ICS, leukotriene modifiers, long-acting  $\beta_2$ -agonists (LABA), and biologic therapies  
252 was positively associated with exacerbation count (S4 Table). Bivariate analyses comparing the  
253 distribution of characteristics between the study cohort and patients excluded due to missing  
254 EHR data found statistically significant differences in years followed, age, sex, health insurance  
255 type, COPD, allergic rhinitis, Elixhauser comorbidity score, and ICS ( $p < 0.001$ ) (S5 Table).

256 Based on Pearson's correlation coefficients, there were no strong correlations between  
257 any EHR-derived or SEDH variables, except for  $\text{NO}_2$  and  $\text{PM}_{2.5}$  ( $\rho = 0.77$ ) (S4 Fig). Moderate  
258 correlations ( $|\rho| > 0.50$ ) were observed between age and Medicare health insurance, Black race  
259 and ADI, and  $\text{NO}_2$  and NDVI. Furthermore, adjusted generalized VIFs for all variables did not  
260 exceed 2.00, suggesting that all variables could be included in multivariable models (S6 Table).

261

262 Individual risk factors associated with asthma exacerbations

263 ORs for the EHR-derived and SEDH variables included in the multivariable logistic regression  
264 model are summarized in Table 2. The EHR-derived variables years followed, age 35-54, Black  
265 race, and ICS had the strongest positive associations with having at least one exacerbation during  
266 the study period ( $p < 0.001$ ) (Table 2). These effects persisted after additionally adjusting for  
267 SEDH variables, and of the SEDH variables in the logistic regression model, only NO<sub>2</sub> exposure  
268 was positively associated with exacerbations ( $p = 0.0059$ ). Inclusion of the SEDH variables did  
269 not improve model fit as determined by AIC (8,320 for both the EHR-adjusted and EHR &  
270 SEDH-adjusted models). Sensitivity analyses showed that the risk factors identified by logistic  
271 and negative binomial regression models were mostly consistent, with Black race and ICS  
272 prescription having the strongest effects between both models ( $p < 10^{-4}$ ), and variables such as  
273 Medicaid health insurance and Elixhauser comorbidity score of 1-9 having statistically  
274 significant p-values in both models though smaller in the negative binomial regression ( $p <$   
275  $0.001$ ) than the logistic regression ( $p < 0.05$ ) (S7 Table). However, the negative binomial  
276 regression model did not identify statistically significant associations between asthma  
277 exacerbations and age 35-54 or NO<sub>2</sub> exposure as did the logistic regression, although the  
278 directions of effect were consistent in both models. In addition, the negative binomial regression  
279 model identified an association with the SEDH variable housing code violations ( $p = 0.045$ ) that  
280 was not present in the logistic regression model.

281

### 282 Spatial risk factors associated with exacerbations

283 Maps of ORs across the study region for the unadjusted, EHR-adjusted, and EHR & SEDH-  
284 adjusted spatial GAMs are shown in Fig 2. In the unadjusted model, the global test of the null  
285 hypothesis that asthma exacerbations were not associated with geographic location was

286 significant ( $p < 0.001$ ) (Fig 2A). Local tests identified a statistically significant hotspot of  
287 exacerbations ( $p < 0.01$ ) in West and South Philadelphia with a mean spatial OR of 1.41 (SD  
288 0.14). In the model adjusted for EHR-derived variables (Fig 2B) the global test statistic remained  
289 significant ( $p < 0.001$ ). Local tests again identified a hotspot ( $p < 0.01$ ) in West and South  
290 Philadelphia which had a decreased mean spatial OR of 1.27 (SD 0.055). In this EHR-adjusted  
291 model, the variance in spatial ORs across the study region was 34.0% lower than the variance of  
292 the unadjusted model (S5 Fig). In the model adjusted for both EHR-derived and SEDH variables,  
293 the global test statistic remained significant ( $p < 0.001$ , Fig 2C) and local tests identified a  
294 hotspot ( $p < 0.01$ ) in West Philadelphia that overlapped geographically with the one in the other  
295 models, although of a smaller area and with a smaller mean spatial OR of 1.24 (SD 0.042)  
296 compared to the EHR-adjusted model. The variance in spatial ORs in the EHR & SEDH-  
297 adjusted model was strongly attenuated (66.9% lower than that of the unadjusted model),  
298 suggesting that these variables partially explained the spatial correlation of exacerbations (S5  
299 Fig). The ORs for the other terms included in the spatial GAMs (i.e., the EHR-derived and  
300 SEDH variables) are summarized in Table 3. All variables (i.e., years followed, age 35-54, Black  
301 race, class 3 obesity, Medicaid health insurance, Elixhauser score 1-9, ICS) that were significant  
302 in the multivariable logistic regression models (Table 2) were also significant in the spatial  
303 GAMs (Table 3), except for  $\text{NO}_2$  exposure, which was significant in the logistic regression  
304 model but not in the spatial GAM.

305         In the spatial GAM models adjusted one variable at a time, ADI, race, and health  
306 insurance type most strongly attenuated the variation in spatial ORs (Fig 3), individually  
307 accounting for 55.2%, 38.5%, and 26.5%, respectively, of the variation in the unadjusted model  
308 (S5 Fig). In these models, each variable was positively associated with exacerbations ( $p <$

309 0.001): ADI with OR = 1.05 (95% CI: 1.03, 1.07); Black race with OR = 1.66 (95% CI: 1.44,  
310 1.91); and Medicaid health insurance with OR = 1.30 (95% CI: 1.15, 1.46) (S8 Table). The  
311 spatial distribution of these variables followed similar patterns: high ADI and high density of  
312 Black patients and patients with Medicaid insurance cooccurred in West, North, and South  
313 Philadelphia (Fig 3). No other EHR (S6 Fig) or SEDH (S7 Fig) variable attenuated the hotspot  
314 area or its effect size, however, adjustment for NO<sub>2</sub> levels resulted in an expansion of a coldspot  
315 area (S7A Fig).

316

### 317 Stratified analysis by race

318 Bivariate analysis comparing the distribution of all EHR and SEDH characteristics between  
319 patients of Black and White race found statistically significant differences for all variables except  
320 ethnicity and ICS (Table 4). Given that ADI, race, and health insurance type had the strongest  
321 relationship with asthma exacerbations in spatial analyses, and their spatial distributions were  
322 similar, we performed stratified spatial analyses by race to determine whether ADI and health  
323 insurance status remained significantly associated with asthma exacerbations within race-  
324 stratified groups. After applying SRR inclusion criteria in strata according to race, an additional  
325 265 Black patients were excluded from the stratified spatial analysis, resulting in a sample size of  
326 4,363 patients (Fig 4A). The unadjusted spatial GAM for patients of Black race had a significant  
327 global test statistic ( $p < 0.001$ ) and local tests identified hotspots in West and South Philadelphia  
328 consistent with results of the full cohort (Fig 4B). In contrast to spatial analyses in the full  
329 cohort, adjusting for ADI and health insurance separately for Black patients did not attenuate the  
330 spatial variance in ORs, instead increasing the variance by 4.70% and 2.79%, respectively,  
331 compared to the unadjusted model (Fig 4C and 4D). In patients of White race, 73 additional

332 patients were removed after applying SRR inclusion criteria, resulting in 1,383 patients included  
333 in the spatial model for which the global test statistic was no longer significant ( $p = 0.098$ , S8  
334 Fig).

335

## 336 **Discussion**

337 Our analysis of individual-level risk factors found that Black race and ICS prescription had the  
338 strongest positive associations with asthma exacerbations, as determined by individual-level  
339 logistic regression and spatial GAM models. In our cohort of Penn Medicine asthma patients,  
340 66% with no exacerbations were Black compared to 83% with 5+ exacerbations, consistent with  
341 known racial disparities in asthma and observations in past Penn Medicine cohorts [44,45]. With  
342 regard to the observed association between exacerbations and ICS prescription, international  
343 asthma management guidelines underwent a major shift in 2019, recommending ICS as part of  
344 the first-line treatment for all asthma patients [46]. This shift was not reflected in our cohort,  
345 with only 76.0% of patients prescribed ICS. We observed exacerbations in patients in our cohort  
346 regardless of whether they had an ICS prescription, however, the strong association between ICS  
347 and exacerbations suggests that patients with more severe asthma were prescribed ICS more  
348 frequently than those with milder asthma. Our sensitivity analysis found that logistic regression  
349 identified positive associations between age 35-54 and NO<sub>2</sub> exposure that were not observed in a  
350 negative binomial regression model, suggesting that these factors were associated with risk of  
351 having at least one exacerbation compared to none, but not with having a higher count of  
352 exacerbations.

353 Our spatial analysis of patient-level data revealed several important insights. First, we  
354 observed that asthma exacerbation risk across Philadelphia was spatially correlated and



355 identified a hotspot with 41% higher odds of exacerbation compared to the median across the  
356 study region. This finding is consistent with the results of community-based pediatric asthma  
357 screening in Philadelphia, which have found that local asthma prevalence can vary significantly  
358 from regional or national estimates [47]. Our findings are also consistent with studies that have  
359 assessed spatial heterogeneity of pediatric and adult asthma data in other United States  
360 metropolitan areas, albeit with less granular spatial resolution. Zárate et al. observed statistically  
361 significant spatial patterning of asthma-related emergency department visits across census tracts  
362 in Central Texas [48], Grunwell et al. identified a group of contiguous census tracts in the State  
363 of Georgia with high rates of admission to the pediatric intensive care unit for asthma [49], and  
364 Harris et al. and Corburn et al. identified a statistically significant cluster of zip codes in St.  
365 Louis, Missouri and of census tracts in New York City, respectively, with elevated pediatric  
366 asthma hospitalization rates [50,51]. Our observation of a West and South Philadelphia hotspot  
367 of exacerbation risk is also consistent with analyses of past Penn Medicine cohorts [3,4] that  
368 focused on validating methods for augmenting EHR datasets rather than identifying factors  
369 associated with the hotspots.

370         The factors we found to be associated with asthma exacerbations according to EHR- and  
371 EHR & SEDH- adjusted spatial GAM models were largely consistent with individual-level  
372 logistic regression findings, but the spatial analysis provided an improved context to understand  
373 the individual-level results. Adjusting for all EHR and SEDH variables decreased the variance in  
374 spatial ORs by 66.9%, indicating that these variables together accounted for a large proportion of  
375 the spatial variance in exacerbation odds. By adjusting the spatial model one variable at a time,  
376 we found that ADI, race, and health insurance type most attenuated the hotspot area and effect  
377 size by reducing the variance of spatial ORs, suggesting that these variables were the most

378 influential in determining the spatial distribution of exacerbation risk. Our findings are consistent  
379 with known asthma disparities by race/ethnicity and socioeconomic status [7–11], as well as past  
380 neighborhood-level analyses of pediatric asthma: Harris et al. and Corburn et al. found that  
381 asthma hospitalization hotspots in St. Louis and New York City had greater proportions of non-  
382 White residents and greater rates of poverty, unemployment, high-density housing, and lack of  
383 access to a household vehicle, although they did not test for statistical significance [50,51].  
384 Grunwell et al. found a statistically significant difference between hotspot and non-hotspot  
385 census tracts in Georgia for poverty, unemployment, and high-density housing, but not for race  
386 [49].

387        Nearly all patient characteristics in our cohort, including health insurance type and ADI,  
388 differed significantly between Black and White patients (Table 4). Most notably, 8.5% of White  
389 patients had Medicaid health insurance compared to 39% of Black patients, and the median ADI  
390 for White patients was 2.60 (IQR 1.50-4.30) compared to 8.40 for Black patients (IQR 6.50-  
391 9.40), making it difficult to assess confounding in our spatial models. Although the VIF indicated  
392 that all variables could be included in a multivariable model without substantially inflating  
393 variance, collinearity between race and ADI as well as race and health insurance type (S4 Fig)  
394 may help explain why ADI and health insurance type were statistically significant in bivariable  
395 spatial models but not in the EHR & SEDH-adjusted spatial GAM nor in the EHR & SEDH-  
396 adjusted logistic regression (Tables 2 and 3). We attempted to overcome some of these  
397 limitations by stratifying our analysis by race. We found that, unlike in the full cohort, adjusting  
398 for ADI and health insurance type for Black patients did not attenuate the variance in spatial  
399 ORs, suggesting that in our cohort the association between these variables and asthma  
400 exacerbations was confounded by race. Our results are consistent with previous observations that

401 racial disparities in asthma control persist even after accounting socioeconomic status [52], but  
402 that it is difficult to separate out the effects of socioeconomic status from the effects of race [53].  
403 Confounding of the asthma-socioeconomic status relationship by race has also been observed in  
404 past neighborhood-level analyses of asthma morbidity. Zárate et al. found that spatial patterning  
405 of asthma-related emergency department visits in Central Texas was partially explained by  
406 socioeconomic characteristics in White patients, but not in Black or Hispanic patients [48]. More  
407 broadly, understanding the relative contributions of many social determinants of health to asthma  
408 is made difficult by their unequal distribution across racial/ethnic groups in the United States  
409 [10].

410 Our health insurance type variable serves as a proxy for individual-level socioeconomic  
411 status, and the relationship we measured between it and asthma exacerbation risk is potentially  
412 mediated by several pathways including increased rates of smoking [54], psychosocial stress  
413 [55], and obesity [56], or an unmeasured variable that varies with socioeconomic status and is  
414 also associated with minoritized racial and ethnicity groups in the United States [57]. On the  
415 other hand, low neighborhood-level socioeconomic status, which we measured with ADI, is  
416 associated with differential exposure to indoor and outdoor air pollution, psychosocial stress  
417 from neighborhood violence, and community norms surrounding health behaviors, all of which  
418 have been linked to asthma exacerbations [27]. Due to geographic segregation by race that  
419 resulted from structural racism and is common in many US cities, including in Philadelphia as  
420 we observed in our study, race and neighborhood-level SES are also highly correlated [58]. Thus,  
421 our inability to identify an association between asthma exacerbations and ADI when restricting  
422 our analysis to Black patients may be due to a restriction of the range of people across the ADI  
423 spectrum relative to the range observed in all patients [48]. Future work is needed to understand

424 what specific SEDH variables that covary with race, ADI, and health insurance type are the  
425 primary drivers of local disparities in asthma exacerbation risk across Philadelphia.

426 Our results demonstrate that integration of diverse SEDH datasets with the EHR and the  
427 use of both spatial and non-spatial modeling approaches are helpful to understand factors  
428 contributing to complex health conditions in real world populations. In both our logistic  
429 regression models and spatial GAMs, model fit was not improved by adjusting for SEDH  
430 variables in addition to EHR-derived variables. However, in our spatial models, adjusting for  
431 SEDH variables resulted in twice as much reduction of the initial variance in spatial ORs  
432 compared to adjusting for EHR variables only. Our non-spatial and spatial models also identified  
433 different sets of factors associated with exacerbations. For example, ICS prescription was found  
434 to have a strong positive association with exacerbations in logistic regression models but did not  
435 contribute to the spatial distribution of ORs; conversely, ADI attenuated the variance in spatial  
436 ORs more strongly than all other variables tested but was not significant in either logistic  
437 regression or negative binomial models. These findings present a framework for future efforts to  
438 expand the scope of EHR data, which, especially as the spatial resolution of SEDH datasets  
439 continues to increase, will allow for improved individualized exposure estimates. In the future,  
440 integration of SEDH data into the EHR may be helpful to tailor asthma management strategies  
441 and for health systems to create population-level interventions to improve health of their patients.

442 This study is strengthened by the high spatial resolution of both our SEDH data and our  
443 analysis. Integrating the highest resolution SEDH data available during the time of the study  
444 period allowed us to most closely approximate individual-level exposures, and analyzing EHR  
445 data at a fine resolution allowed us to understand local health patterns that may not be visible at  
446 the census tract or zip-code level. Additional strengths included accounting for many variables

447 and increasing the likelihood that Penn Medicine was patients' primary care provider by applying  
448 SRR restriction. Our study is also subject to limitations, including some related to use of EHR  
449 data, such as missingness, entry error, and phenotype misclassification. Additionally, the  
450 geocoded addresses used in our study reflect residence at the time of the data pull, but they do  
451 not account for residential mobility during the study period, nor does residence information  
452 provide a full assessment of environmental exposures.

453

#### 454 **Conclusion**

455 By integrating seven datasets containing information on SEDH with an EHR dataset to create  
456 individualized exposure assessments, we identified non-spatial and spatial factors associated  
457 with asthma exacerbations. Race and prescription of an ICS were most strongly associated with  
458 exacerbations in individual-level models. Race also accounted for the most spatial variation in  
459 exacerbation odds, along with ADI and health insurance type. Because these three variables had  
460 similar spatial distributions, understanding which contributes most to disparities in asthma  
461 exacerbations requires additional study of people living in the region identified as a hotspot. Our  
462 findings demonstrate how integrating diverse data types and geospatial modeling approaches  
463 with EHR data are helpful to understand complex diseases locally.

464

#### 465 **Acknowledgements**

466 We would like to thank Sunil Thomas from the University of Pennsylvania Penn Data Store for  
467 extracting the EHR data used for this project.

468 **Table 1. Patient characteristics by exacerbation count levels.** Shown are the characteristics of  
 469 patients according to their number of exacerbations during the study period. For each  
 470 exacerbation level, the number and percentage of patients are shown for categorical variables,  
 471 and the Median and Interquartile Range (IQR) are shown for continuous variables.  
 472

| Characteristic <sup>a</sup>         | Number of Exacerbations |                   |                   |                   | p-value <sup>b</sup> |
|-------------------------------------|-------------------------|-------------------|-------------------|-------------------|----------------------|
|                                     | 0<br>N = 4,327          | 1-2<br>N = 1,810  | 3-4<br>N = 328    | 5+<br>N = 191     |                      |
| <b>Years followed</b>               | 2.69 (1.89, 3.32)       | 2.81 (1.96, 3.46) | 3.12 (2.48, 3.64) | 3.60 (2.82, 3.84) | <10 <sup>-4</sup>    |
| <b>Age</b>                          |                         |                   |                   |                   | <10 <sup>-4</sup>    |
| 18-34                               | 1,498 (35%)             | 524 (29%)         | 82 (25%)          | 51 (27%)          |                      |
| 35-54                               | 1,445 (33%)             | 688 (38%)         | 144 (44%)         | 81 (42%)          |                      |
| 55-74                               | 1,198 (28%)             | 512 (28%)         | 87 (27%)          | 54 (28%)          |                      |
| 75+                                 | 186 (4.3%)              | 86 (4.8%)         | 15 (4.6%)         | 5 (2.6%)          |                      |
| <b>Sex</b>                          |                         |                   |                   |                   | 0.29                 |
| Male                                | 1,020 (24%)             | 397 (22%)         | 71 (22%)          | 51 (27%)          |                      |
| Female                              | 3,307 (76%)             | 1,413 (78%)       | 257 (78%)         | 140 (73%)         |                      |
| <b>Race</b>                         |                         |                   |                   |                   | <10 <sup>-4</sup>    |
| White                               | 1,059 (24%)             | 325 (18%)         | 52 (16%)          | 20 (10%)          |                      |
| Black                               | 2,860 (66%)             | 1,349 (75%)       | 260 (79%)         | 159 (83%)         |                      |
| Unknown/Other                       | 408 (9.4%)              | 136 (7.5%)        | 16 (4.9%)         | 12 (6.3%)         |                      |
| <b>Ethnicity</b>                    |                         |                   |                   |                   | 0.10                 |
| non-Hispanic/Latino                 | 4,160 (96%)             | 1,747 (97%)       | 322 (98%)         | 188 (98%)         |                      |
| Hispanic/Latino                     | 167 (3.9%)              | 63 (3.5%)         | 6 (1.8%)          | 3 (1.6%)          |                      |
| <b>BMI</b>                          |                         |                   |                   |                   | <10 <sup>-4</sup>    |
| Not Overweight or Obese             | 907 (21%)               | 305 (17%)         | 49 (15%)          | 30 (16%)          |                      |
| Overweight                          | 1,003 (23%)             | 430 (24%)         | 81 (25%)          | 40 (21%)          |                      |
| Class 1 Obesity                     | 979 (23%)               | 381 (21%)         | 63 (19%)          | 37 (19%)          |                      |
| Class 2 Obesity                     | 650 (15%)               | 297 (16%)         | 40 (12%)          | 41 (21%)          |                      |
| Class 3 Obesity                     | 788 (18%)               | 397 (22%)         | 95 (29%)          | 43 (23%)          |                      |
| <b>Health insurance type</b>        |                         |                   |                   |                   | <10 <sup>-4</sup>    |
| Private                             | 1,976 (46%)             | 735 (41%)         | 131 (40%)         | 49 (26%)          |                      |
| Medicaid                            | 1,270 (29%)             | 625 (35%)         | 113 (34%)         | 87 (46%)          |                      |
| Medicare                            | 1,081 (25%)             | 450 (25%)         | 84 (26%)          | 55 (29%)          |                      |
| <b>Smoking status</b>               |                         |                   |                   |                   | <10 <sup>-4</sup>    |
| Never Smoked                        | 2,533 (59%)             | 997 (55%)         | 167 (51%)         | 84 (44%)          |                      |
| Ever Smoker                         | 1,233 (28%)             | 517 (29%)         | 110 (34%)         | 77 (40%)          |                      |
| Current Smoker                      | 561 (13%)               | 296 (16%)         | 51 (16%)          | 30 (16%)          |                      |
| <b>COPD</b>                         | 398 (9.2%)              | 219 (12%)         | 44 (13%)          | 30 (16%)          | <10 <sup>-4</sup>    |
| <b>Allergic rhinitis</b>            | 1,478 (34%)             | 636 (35%)         | 133 (41%)         | 104 (54%)         | <10 <sup>-4</sup>    |
| <b>Elixhauser comorbidity score</b> |                         |                   |                   |                   | <10 <sup>-4</sup>    |
| <0                                  | 220 (5.1%)              | 85 (4.7%)         | 21 (6.4%)         | 5 (2.6%)          |                      |
| 0                                   | 3,035 (70%)             | 1,214 (67%)       | 193 (59%)         | 99 (52%)          |                      |
| 1-9                                 | 723 (17%)               | 356 (20%)         | 71 (22%)          | 60 (31%)          |                      |
| 10+                                 | 349 (8.1%)              | 155 (8.6%)        | 43 (13%)          | 27 (14%)          |                      |
| <b>ICS</b>                          | 3,074 (71%)             | 1,489 (82%)       | 309 (94%)         | 188 (98%)         | <10 <sup>-4</sup>    |
| <b>NO<sub>2</sub> exposure</b>      | 7.20 (6.86, 7.77)       | 7.18 (6.90, 7.70) | 7.24 (6.86, 7.79) | 7.14 (6.78, 7.56) | 0.35                 |
| <b>PM<sub>2.5</sub> exposure</b>    | 8.20 (7.84, 8.65)       | 8.16 (7.81, 8.62) | 8.22 (7.86, 8.62) | 8.14 (7.78, 8.58) | 0.018                |
| <b>Toxic releases exposure</b>      | 231 (5.3%)              | 87 (4.8%)         | 18 (5.5%)         | 10 (5.2%)         | 0.85                 |
| <b>Vehicular traffic exposure</b>   |                         |                   |                   |                   | 0.095                |

|                                               |                   |                   |                   |                   |                   |
|-----------------------------------------------|-------------------|-------------------|-------------------|-------------------|-------------------|
| Lowest                                        | 1,079 (25%)       | 447 (25%)         | 85 (26%)          | 53 (28%)          |                   |
| Low                                           | 1,079 (25%)       | 441 (24%)         | 96 (29%)          | 48 (25%)          |                   |
| High                                          | 1,046 (24%)       | 485 (27%)         | 80 (24%)          | 53 (28%)          |                   |
| Highest                                       | 1,123 (26%)       | 437 (24%)         | 67 (20%)          | 37 (19%)          |                   |
| <b>Area deprivation index</b>                 | 7.00 (3.50, 9.10) | 7.80 (4.30, 9.20) | 7.70 (5.30, 9.13) | 7.80 (5.25, 9.30) | <10 <sup>-4</sup> |
| <b>Housing violations</b>                     | 0.80 (0.36, 1.47) | 0.83 (0.39, 1.49) | 0.90 (0.45, 1.61) | 0.84 (0.38, 1.28) | 0.083             |
| <b>Normalized difference vegetation index</b> | 0.21 (0.17, 0.27) | 0.21 (0.17, 0.26) | 0.21 (0.16, 0.27) | 0.22 (0.19, 0.26) | 0.26              |

473 <sup>a</sup>Units are as follows: age (years), ICS (yes/no indicator of inhaled corticosteroid prescription), NO<sub>2</sub> (ppbv), PM2.5  
474 (µg/m<sup>3</sup>), toxic releases exposure (yes/no indicator of exposure), area deprivation index (unitless index scaled by  
475 dividing by 10), housing violations (housing violations per 100 people), normalized difference vegetation index  
476 (unitless index ranging from -1 to 1). See Methods for more details.  
477 <sup>b</sup>Kruskal-Wallis rank sum test; Pearson's Chi-squared test

478 **Table 2. Individual-level asthma exacerbation risk factors in multivariable logistic**  
 479 **regression models.** Shown are the adjusted odds ratios (ORs), 95% confidence intervals (CIs),  
 480 and p-values for logistic regression models of asthma exacerbations as a dichotomous outcome  
 481 adjusted for EHR-derived variables only and for both EHR and SEDH variables.  
 482

| Characteristic <sup>a</sup>         | EHR-adjusted |            |                      | EHR & SEDH-adjusted |            |                      |
|-------------------------------------|--------------|------------|----------------------|---------------------|------------|----------------------|
|                                     | OR           | 95% CI     | p-value              | OR                  | 95% CI     | p-value              |
| <b>Years followed</b>               | 1.16         | 1.09, 1.24 | <10 <sup>-4</sup>    | 1.17                | 1.09, 1.24 | <10 <sup>-4</sup>    |
| <b>Age</b>                          |              |            |                      |                     |            |                      |
| 18-34                               | —            | —          |                      | —                   | —          |                      |
| 35-54                               | 1.26         | 1.11, 1.44 | 5.2x10 <sup>-4</sup> | 1.27                | 1.12, 1.45 | 3.6x10 <sup>-4</sup> |
| 55-74                               | 1.08         | 0.92, 1.28 | 0.35                 | 1.09                | 0.92, 1.29 | 0.30                 |
| 75+                                 | 1.29         | 0.96, 1.74 | 0.090                | 1.33                | 0.99, 1.79 | 0.060                |
| <b>Sex</b>                          |              |            |                      |                     |            |                      |
| Male                                | —            | —          |                      | —                   | —          |                      |
| Female                              | 0.99         | 0.87, 1.12 | 0.82                 | 0.98                | 0.87, 1.12 | 0.79                 |
| <b>Race</b>                         |              |            |                      |                     |            |                      |
| White                               | —            | —          |                      | —                   | —          |                      |
| Black                               | 1.49         | 1.29, 1.72 | <10 <sup>-4</sup>    | 1.52                | 1.28, 1.81 | <10 <sup>-4</sup>    |
| Unknown/Other                       | 1.01         | 0.79, 1.28 | 0.95                 | 1.01                | 0.79, 1.29 | 0.93                 |
| <b>Ethnicity</b>                    |              |            |                      |                     |            |                      |
| Non-Hispanic/Latino                 | —            | —          |                      | —                   | —          |                      |
| Hispanic/Latino                     | 0.99         | 0.71, 1.36 | 0.95                 | 0.98                | 0.71, 1.35 | 0.92                 |
| <b>BMI</b>                          |              |            |                      |                     |            |                      |
| Not Overweight or Obese             | —            | —          |                      | —                   | —          |                      |
| Overweight                          | 1.17         | 0.99, 1.38 | 0.059                | 1.18                | 1.00, 1.39 | 0.054                |
| Class 1 Obesity                     | 0.97         | 0.82, 1.15 | 0.71                 | 0.98                | 0.82, 1.16 | 0.80                 |
| Class 2 Obesity                     | 1.09         | 0.90, 1.31 | 0.39                 | 1.09                | 0.90, 1.31 | 0.39                 |
| Class 3 Obesity                     | 1.24         | 1.04, 1.48 | 0.016                | 1.25                | 1.04, 1.49 | 0.015                |
| <b>Health insurance type</b>        |              |            |                      |                     |            |                      |
| Private                             | —            | —          |                      | —                   | —          |                      |
| Medicaid                            | 1.22         | 1.07, 1.39 | 0.0034               | 1.19                | 1.04, 1.36 | 0.012                |
| Medicare                            | 0.90         | 0.77, 1.06 | 0.21                 | 0.89                | 0.76, 1.04 | 0.15                 |
| <b>Smoking status</b>               |              |            |                      |                     |            |                      |
| Never Smoked                        | —            | —          |                      | —                   | —          |                      |
| Ever Smoker                         | 1.04         | 0.92, 1.18 | 0.51                 | 1.04                | 0.92, 1.18 | 0.56                 |
| Current Smoker                      | 1.17         | 0.99, 1.37 | 0.059                | 1.16                | 0.98, 1.36 | 0.077                |
| <b>COPD</b>                         |              |            |                      |                     |            |                      |
| No                                  | —            | —          |                      | —                   | —          |                      |
| Yes                                 | 1.14         | 0.95, 1.36 | 0.17                 | 1.11                | 0.93, 1.34 | 0.24                 |
| <b>Allergic rhinitis</b>            |              |            |                      |                     |            |                      |
| No                                  | —            | —          |                      | —                   | —          |                      |
| Yes                                 | 1.09         | 0.97, 1.22 | 0.13                 | 1.09                | 0.98, 1.22 | 0.11                 |
| <b>Elixhauser comorbidity score</b> |              |            |                      |                     |            |                      |
| <0                                  | —            | —          |                      | —                   | —          |                      |
| 0                                   | 1.20         | 0.94, 1.54 | 0.14                 | 1.20                | 0.94, 1.54 | 0.14                 |
| 1-9                                 | 1.40         | 1.08, 1.83 | 0.012                | 1.39                | 1.07, 1.82 | 0.015                |
| 10+                                 | 1.20         | 0.90, 1.62 | 0.22                 | 1.19                | 0.89, 1.61 | 0.25                 |
| <b>ICS</b>                          |              |            |                      |                     |            |                      |
| No                                  | —            | —          |                      | —                   | —          |                      |
| Yes                                 | 2.19         | 1.91, 2.51 | <10 <sup>-4</sup>    | 2.20                | 1.92, 2.52 | <10 <sup>-4</sup>    |
| <b>NO<sub>2</sub> exposure</b>      |              |            |                      | 1.27                | 1.07, 1.51 | 0.0059               |
| <b>PM<sub>2.5</sub> exposure</b>    |              |            |                      | 0.89                | 0.72, 1.09 | 0.25                 |



|                                               |       |  |  |       |            |      |
|-----------------------------------------------|-------|--|--|-------|------------|------|
| <b>Toxic releases exposure</b>                |       |  |  |       |            |      |
| No                                            |       |  |  | —     | —          |      |
| Yes                                           |       |  |  | 1.07  | 0.83, 1.37 | 0.60 |
| <b>Vehicular traffic exposure</b>             |       |  |  |       |            |      |
| Lowest                                        |       |  |  | —     | —          |      |
| Low                                           |       |  |  | 1.01  | 0.87, 1.17 | 0.86 |
| High                                          |       |  |  | 1.10  | 0.95, 1.28 | 0.19 |
| Highest                                       |       |  |  | 0.95  | 0.82, 1.11 | 0.54 |
| <b>Area deprivation index</b>                 |       |  |  | 1.02  | 0.99, 1.04 | 0.22 |
| <b>Housing violations</b>                     |       |  |  | 0.96  | 0.90, 1.01 | 0.11 |
| <b>Normalized difference vegetation index</b> |       |  |  | 1.08  | 0.47, 2.44 | 0.86 |
| <b>AIC</b>                                    | 8,320 |  |  | 8,320 |            |      |

483 <sup>a</sup>Units are as follows: age (years), ICS (yes/no indicator of inhaled corticosteroid prescription), NO<sub>2</sub> (ppbv), PM2.5  
 484 (µg/m<sup>3</sup>), toxic releases exposure (yes/no indicator of exposure), area deprivation index (unitless index scaled by  
 485 dividing by 10), housing violations (housing violations per 100 people), normalized difference vegetation index  
 486 (unitless index ranging from -1 to 1). See Methods for more details.

487 **Table 3. Spatial asthma exacerbation risk factors in multivariable spatial GAMs.** Shown are  
 488 the adjusted odds ratios (ORs), 95% confidence intervals (CIs), and p-values for spatial GAMs of  
 489 asthma exacerbations as a dichotomous outcome adjusted for EHR-derived variables only and  
 490 for both EHR-derived and SEDH variables.  
 491

| Characteristic <sup>a</sup>         | EHR-adjusted |            |                      | EHR & SEDH-adjusted |            |                      |
|-------------------------------------|--------------|------------|----------------------|---------------------|------------|----------------------|
|                                     | OR           | 95% CI     | p-value              | OR                  | 95% CI     | p-value              |
| <b>Years followed</b>               | 1.17         | 1.10, 1.25 | <10 <sup>-4</sup>    | 1.17                | 1.09, 1.25 | <10 <sup>-4</sup>    |
| <b>Age</b>                          |              |            |                      |                     |            |                      |
| 18-34                               | —            | —          | —                    | —                   | —          | —                    |
| 35-54                               | 1.28         | 1.12, 1.46 | 3.3x10 <sup>-4</sup> | 1.27                | 1.12, 1.46 | 3.5x10 <sup>-4</sup> |
| 55-74                               | 1.08         | 0.91, 1.27 | 0.39                 | 1.08                | 0.91, 1.27 | 0.38                 |
| 75+                                 | 1.31         | 0.97, 1.76 | 0.078                | 1.32                | 0.98, 1.78 | 0.070                |
| <b>Sex</b>                          |              |            |                      |                     |            |                      |
| Male                                | —            | —          | —                    | —                   | —          | —                    |
| Female                              | 0.99         | 0.87, 1.12 | 0.85                 | 0.99                | 0.87, 1.12 | 0.84                 |
| <b>Race</b>                         |              |            |                      |                     |            |                      |
| White                               | —            | —          | —                    | —                   | —          | —                    |
| Black                               | 1.58         | 1.35, 1.84 | <10 <sup>-4</sup>    | 1.55                | 1.30, 1.85 | <10 <sup>-4</sup>    |
| Unknown/Other                       | 1.03         | 0.81, 1.31 | 0.81                 | 1.02                | 0.79, 1.30 | 0.90                 |
| <b>Ethnicity</b>                    |              |            |                      |                     |            |                      |
| non-Hispanic/Latino                 | —            | —          | —                    | —                   | —          | —                    |
| Hispanic/Latino                     | 1.03         | 0.74, 1.42 | 0.87                 | 1.02                | 0.74, 1.41 | 0.91                 |
| <b>BMI</b>                          |              |            |                      |                     |            |                      |
| Not Overweight or Obese             | —            | —          | —                    | —                   | —          | —                    |
| Overweight                          | 1.18         | 1.01, 1.40 | 0.043                | 1.18                | 1.00, 1.39 | 0.047                |
| Class 1 Obesity                     | 0.98         | 0.83, 1.16 | 0.82                 | 0.98                | 0.83, 1.16 | 0.81                 |
| Class 2 Obesity                     | 1.09         | 0.90, 1.31 | 0.37                 | 1.09                | 0.90, 1.31 | 0.39                 |
| Class 3 Obesity                     | 1.26         | 1.05, 1.50 | 0.011                | 1.25                | 1.05, 1.50 | 0.013                |
| <b>Health insurance type</b>        |              |            |                      |                     |            |                      |
| Private                             | —            | —          | —                    | —                   | —          | —                    |
| Medicaid                            | 1.18         | 1.03, 1.35 | 0.014                | 1.18                | 1.03, 1.35 | 0.018                |
| Medicare                            | 0.89         | 0.76, 1.05 | 0.16                 | 0.89                | 0.76, 1.04 | 0.15                 |
| <b>Smoking status</b>               |              |            |                      |                     |            |                      |
| Never Smoked                        | —            | —          | —                    | —                   | —          | —                    |
| Ever Smoker                         | 1.04         | 0.91, 1.17 | 0.57                 | 1.03                | 0.91, 1.17 | 0.59                 |
| Current Smoker                      | 1.15         | 0.98, 1.35 | 0.094                | 1.15                | 0.98, 1.35 | 0.095                |
| <b>COPD</b>                         |              |            |                      |                     |            |                      |
| No                                  | —            | —          | —                    | —                   | —          | —                    |
| Yes                                 | 1.10         | 0.92, 1.32 | 0.30                 | 1.10                | 0.92, 1.32 | 0.29                 |
| <b>Allergic rhinitis</b>            |              |            |                      |                     |            |                      |
| No                                  | —            | —          | —                    | —                   | —          | —                    |
| Yes                                 | 1.09         | 0.98, 1.22 | 0.12                 | 1.10                | 0.98, 1.22 | 0.11                 |
| <b>Elixhauser comorbidity score</b> |              |            |                      |                     |            |                      |
| <0                                  | —            | —          | —                    | —                   | —          | —                    |
| 0                                   | 1.20         | 0.94, 1.54 | 0.14                 | 1.20                | 0.94, 1.53 | 0.15                 |
| 1-9                                 | 1.39         | 1.06, 1.81 | 0.016                | 1.38                | 1.06, 1.80 | 0.018                |
| 10+                                 | 1.18         | 0.87, 1.59 | 0.28                 | 1.17                | 0.87, 1.58 | 0.29                 |
| <b>ICS</b>                          |              |            |                      |                     |            |                      |
| No                                  | —            | —          | —                    | —                   | —          | —                    |
| Yes                                 | 2.22         | 1.93, 2.54 | <10 <sup>-4</sup>    | 2.21                | 1.93, 2.54 | <10 <sup>-4</sup>    |
| <b>NO<sub>2</sub> exposure</b>      |              |            |                      | 1.08                | 0.82, 1.43 | 0.58                 |
| <b>PM<sub>2.5</sub> exposure</b>    |              |            |                      | 1.08                | 0.81, 1.45 | 0.59                 |

|                                               |       |  |  |       |            |      |
|-----------------------------------------------|-------|--|--|-------|------------|------|
| <b>Toxic releases exposure</b>                |       |  |  |       |            |      |
| No                                            |       |  |  | —     | —          | —    |
| Yes                                           |       |  |  | 1.06  | 0.82, 1.37 | 0.65 |
| <b>Vehicular traffic exposure</b>             |       |  |  |       |            |      |
| Lowest                                        |       |  |  | —     | —          | —    |
| Low                                           |       |  |  | 1.02  | 0.88, 1.18 | 0.76 |
| High                                          |       |  |  | 1.10  | 0.95, 1.27 | 0.22 |
| Highest                                       |       |  |  | 0.97  | 0.83, 1.13 | 0.66 |
| <b>Area deprivation index</b>                 |       |  |  | 1.01  | 0.99, 1.04 | 0.32 |
| <b>Housing violations</b>                     |       |  |  | 0.97  | 0.91, 1.02 | 0.23 |
| <b>Normalized difference vegetation index</b> |       |  |  | 0.99  | 0.43, 2.27 | 0.97 |
| <b>AIC<sup>b</sup></b>                        | 8,293 |  |  | 8,307 |            |      |

492 <sup>a</sup>Units are as follows: age (years), ICS (yes/no indicator of inhaled corticosteroid prescription), NO<sub>2</sub> (ppbv), PM2.5  
 493 (µg/m<sup>3</sup>), toxic releases exposure (yes/no indicator of exposure), area deprivation index (unitless index scaled by  
 494 dividing by 10), housing violations (housing violations per 100 people), normalized difference vegetation index  
 495 (unitless index ranging from -1 to 1). See Methods for more details.

496 <sup>b</sup>The AIC of the unadjusted model was 8,576.

497 **Table 4. Patient characteristics by race.** Shown are the number and percentage of patients in  
 498 each level for categorical variables, and the Median and Interquartile Range (IQR) for  
 499 continuous variables in patients of White race versus Black race.  
 500

| Characteristic <sup>a</sup>         | Race               |                    | p-value <sup>b</sup> |
|-------------------------------------|--------------------|--------------------|----------------------|
|                                     | White<br>N = 1,456 | Black<br>N = 4,628 |                      |
| <b>Exacerbation count</b>           |                    |                    | <10 <sup>-4</sup>    |
| 0                                   | 1,059 (73%)        | 2,860 (62%)        |                      |
| 1-2                                 | 325 (22%)          | 1,349 (29%)        |                      |
| 3-4                                 | 52 (3.6%)          | 260 (5.6%)         |                      |
| 5+                                  | 20 (1.4%)          | 159 (3.4%)         |                      |
| <b>Years followed</b>               | 2.62 (1.86, 3.28)  | 2.82 (1.98, 3.46)  | <10 <sup>-4</sup>    |
| <b>Age</b>                          |                    |                    | <10 <sup>-4</sup>    |
| 18-34                               | 468 (32%)          | 1,458 (32%)        |                      |
| 35-54                               | 481 (33%)          | 1,667 (36%)        |                      |
| 55-74                               | 407 (28%)          | 1,332 (29%)        |                      |
| 75+                                 | 100 (6.9%)         | 171 (3.7%)         |                      |
| <b>Sex</b>                          |                    |                    | <10 <sup>-4</sup>    |
| Male                                | 473 (32%)          | 905 (20%)          |                      |
| Female                              | 983 (68%)          | 3,723 (80%)        |                      |
| <b>Ethnicity</b>                    |                    |                    | 0.0024               |
| non-Hispanic/Latino                 | 1,431 (98%)        | 4,591 (99%)        |                      |
| Hispanic/Latino                     | 25 (1.7%)          | 37 (0.8%)          |                      |
| <b>BMI</b>                          |                    |                    | <10 <sup>-4</sup>    |
| Not Overweight or Obese             | 522 (36%)          | 633 (14%)          |                      |
| Overweight                          | 461 (32%)          | 936 (20%)          |                      |
| Class 1 Obesity                     | 265 (18%)          | 1,051 (23%)        |                      |
| Class 2 Obesity                     | 106 (7.3%)         | 859 (19%)          |                      |
| Class 3 Obesity                     | 102 (7.0%)         | 1,149 (25%)        |                      |
| <b>Health insurance type</b>        |                    |                    | <10 <sup>-4</sup>    |
| Private                             | 981 (67%)          | 1,621 (35%)        |                      |
| Medicaid                            | 124 (8.5%)         | 1,782 (39%)        |                      |
| Medicare                            | 351 (24%)          | 1,225 (26%)        |                      |
| <b>Smoking status</b>               |                    |                    | <10 <sup>-4</sup>    |
| Never Smoked                        | 898 (62%)          | 2,519 (54%)        |                      |
| Ever Smoker                         | 463 (32%)          | 1,328 (29%)        |                      |
| Current Smoker                      | 95 (6.5%)          | 781 (17%)          |                      |
| <b>COPD</b>                         | 115 (7.9%)         | 536 (12%)          | <10 <sup>-4</sup>    |
| <b>Allergic rhinitis</b>            | 571 (39%)          | 1,541 (33%)        | <10 <sup>-4</sup>    |
| <b>Elixhauser comorbidity score</b> |                    |                    | <10 <sup>-4</sup>    |
| <0                                  | 32 (2.2%)          | 262 (5.7%)         |                      |
| 0                                   | 1,117 (77%)        | 2,986 (65%)        |                      |
| 1-9                                 | 222 (15%)          | 924 (20%)          |                      |
| 10+                                 | 85 (5.8%)          | 456 (9.9%)         |                      |
| <b>ICS</b>                          | 1,105 (76%)        | 3,510 (76%)        | 0.97                 |
| <b>NO<sub>2</sub> exposure</b>      | 7.85 (7.40, 8.18)  | 7.10 (6.81, 7.39)  | <10 <sup>-4</sup>    |
| <b>PM<sub>2.5</sub> exposure</b>    | 8.72 (8.28, 8.90)  | 8.05 (7.77, 8.41)  | <10 <sup>-4</sup>    |
| <b>Toxic releases exposure</b>      | 115 (7.9%)         | 194 (4.2%)         | <10 <sup>-4</sup>    |
| <b>Vehicular traffic exposure</b>   |                    |                    | <10 <sup>-4</sup>    |
| Lowest                              | 279 (19%)          | 1,283 (28%)        |                      |
| Low                                 | 267 (18%)          | 1,244 (27%)        |                      |
| High                                | 312 (21%)          | 1,177 (25%)        |                      |

|                                               |                   |                   |                   |
|-----------------------------------------------|-------------------|-------------------|-------------------|
| Highest                                       | 598 (41%)         | 924 (20%)         |                   |
| <b>Area deprivation index</b>                 | 2.60 (1.50, 4.30) | 8.40 (6.50, 9.40) | <10 <sup>-4</sup> |
| <b>Housing violations</b>                     | 0.41 (0.15, 0.74) | 0.99 (0.52, 1.68) | <10 <sup>-4</sup> |
| <b>Normalized difference vegetation index</b> | 0.18 (0.13, 0.25) | 0.22 (0.18, 0.27) | <10 <sup>-4</sup> |

501 <sup>a</sup>Units are as follows: age (years), ICS (yes/no indicator of inhaled corticosteroid prescription), NO<sub>2</sub> (ppbv), PM2.5  
502 (µg/m<sup>3</sup>), toxic releases exposure (yes/no indicator of exposure), area deprivation index (unitless index scaled by  
503 dividing by 10), housing violations (housing violations per 100 people), normalized difference vegetation index  
504 (unitless index ranging from -1 to 1). See Methods for more details.  
505 <sup>b</sup>Pearson's Chi-squared test; Wilcoxon rank sum test

506 **Figure Legends**

507 **Figure 1. Overview of study design.** Graphical overview of study design, including processing  
508 and linkage of electronic health record (EHR) and social and environmental determinants of  
509 health (SEDH) data, cohort selection including spatial filtering by assessing the representation of  
510 the EHR cohort compared to the underlying population, and patient-level and geospatial analyses  
511 on the expanded EHR dataset.

512 **Figure 2. Spatial odds ratios (ORs) of exacerbations before and after adjusting for EHR-**  
513 **derived and SEDH variables.** (A) Unadjusted spatial GAM (adjusted only for years followed).  
514 (B) Spatial GAM adjusted for EHR-derived variables only. (C) Spatial GAM adjusted for both  
515 EHR-derived and SEDH variables. Base maps were created using the Stamen Design from  
516 Stadia Maps.

517 **Figure 3. Spatial distribution of individual variables that most strongly attenuated the**  
518 **spatial odds ratios (ORs) of exacerbations along with corresponding spatial GAM results**  
519 **adjusted for these individual variables.** Spatial distribution in the study region of (A) the area  
520 deprivation index (ADI), (B) race, and (C) health insurance type of patients. Corresponding  
521 spatial GAMs adjusted only for years followed and (D) ADI, (E) race, or (F) health insurance  
522 type.

523 **Figure 4. Spatial odds ratios (ORs) of exacerbations among Black patients along with the**  
524 **effects of ADI and health insurance type on this distribution.** (A) SRR values for the updated  
525 study region used in spatial GAMs for patients of Black race only (SRR = 1 indicates no  
526 representativeness bias). (B) Unadjusted spatial GAM (adjusted only for years followed) for  
527 patients of Black race (N = 4,363). Spatial GAMs adjusted additionally for (C) area deprivation

528 index (ADI) and (D) health insurance type. Base maps were created using the Stamen Design  
529 from Stadia Maps.

530 **References**

- 531
- 532 1. Mooney SJ, Westreich DJ, El-Sayed AM. Commentary: Epidemiology in the era of big data.  
533 *Epidemiology*. 2015;c: 390–394. doi:10.1097/EDE.0000000000000274
- 534 2. Cook LA, Sachs J, Weiskopf NG. The quality of social determinants data in the electronic  
535 health record: a systematic review. *J Am Med Inform Assoc JAMIA*. 2021;29: 187–196.  
536 doi:10.1093/jamia/ocab199
- 537 3. Xie S, Greenblatt R, Levy MZ, Himes BE. Enhancing Electronic Health Record Data with  
538 Geospatial Information. *AMIA Summits Transl Sci Proc*. 2017;2017: 123–132.
- 539 4. Xie S, Himes BE. Approaches to link geospatially varying social, economic, and  
540 environmental factors with electronic health record data to better understand asthma  
541 exacerbations. *AMIA Annu Symp Proc*. 2018;2018: 1561–1570.
- 542 5. Cui Y, Eccles KM, Kwok RK, Joubert BR, Messier KP, Balshaw DM. Integrating multiscale  
543 geospatial environmental data into large population health studies: challenges and  
544 opportunities. *Toxics*. 2022;10: 403. doi:10.3390/toxics10070403
- 545 6. Schreibman A, Xie S, Hubbard RA, Himes BE. Linking ambient NO<sub>2</sub> pollution measures  
546 with electronic health record data to study asthma exacerbations. *AMIA Summits Transl Sci*  
547 *Proc*. 2023;2023: 467–476.
- 548 7. CDC. Asthma: most recent national asthma data. Atlanta, GA: US Department of Health and  
549 Human Services, CDC; 2020. Available:  
550 [https://www.cdc.gov/asthma/most\\_recent\\_national\\_asthma\\_data.htm](https://www.cdc.gov/asthma/most_recent_national_asthma_data.htm)
- 551 8. Leong AB, Ramsey CD, Celedón JC. The challenge of asthma in minority populations. *Clin*  
552 *Rev Allergy Immunol*. 2012;43: 156–183. doi:10.1007/s12016-011-8263-1
- 553 9. Forno E, Celedón JC. Health disparities in asthma. *Am J Respir Crit Care Med*. 2012;185:  
554 1033–1035. doi:10.1164/rccm.201202-0350ED
- 555 10. Grant T, Croce E, Matsui EC. Asthma and the social determinants of health. *Ann Allergy*  
556 *Asthma Immunol Off Publ Am Coll Allergy Asthma Immunol*. 2022;128: 5–11.  
557 doi:10.1016/j.anai.2021.10.002
- 558 11. Lovinsky-Desir S, Riley IL, Bryant-Stephens T, De Keyser H, Forno E, Kozik AJ, et al.  
559 Research priorities in pediatric asthma morbidity: addressing the impacts of systemic  
560 racism on children with asthma in the United States: an official American Thoracic Society  
561 workshop report. *Ann Am Thorac Soc*. 2024;21: 1349–1364.  
562 doi:10.1513/AnnalsATS.202407-767ST
- 563 12. Global Initiative for Asthma (GINA). Global strategy for asthma management and  
564 prevention (2024 update). Bethesda, MD: Global Initiative for Asthma (GINA); 2024.



- 565 13. Fuhlbrigge A, Peden D, Apter AJ, Boushey HA, Camargo CA, Gern J, et al. Asthma  
566 outcomes: exacerbations. *J Allergy Clin Immunol.* 2012;129: S34–S48.  
567 doi:10.1016/j.jaci.2011.12.983
- 568 14. Krishnan V, Diette GB, Rand CS, Bilderback AL, Merriman B, Hansel NN, et al. Mortality  
569 in patients hospitalized for asthma exacerbations in the United States. *Am J Respir Crit*  
570 *Care Med.* 2006;174: 633–638. doi:10.1164/rccm.200601-007OC
- 571 15. Ivanova JI, Bergman R, Birnbaum HG, Colice GL, Silverman RA, McLaurin K. Effect of  
572 asthma exacerbations on health care costs among asthmatic patients with moderate and  
573 severe persistent asthma. *J Allergy Clin Immunol.* 2012;129: 1229–1235.  
574 doi:10.1016/j.jaci.2012.01.039
- 575 16. Schatz M, Clark S, Camargo CA. Sex differences in the presentation and course of asthma  
576 hospitalizations. *Chest.* 2006;129: 50–55. doi:10.1378/chest.129.1.50
- 577 17. Schatz M, Mosen DM, Kosinski M, Vollmer WM, Magid DJ, O’Connor E, et al. Predictors  
578 of asthma control in a random sample of asthmatic patients. *J Asthma.* 2007;44: 341–345.  
579 doi:10.1080/02770900701344421
- 580 18. Pedersen SE, Bateman ED, Bousquet J, Busse WW, Yoxall S, Clark TJ. Determinants of  
581 response to fluticasone propionate and salmeterol/fluticasone propionate combination in the  
582 Gaining Optimal Asthma control study. *J Allergy Clin Immunol.* 2007;120: 1036–1042.  
583 doi:10.1016/j.jaci.2007.07.016
- 584 19. Price D, Zhang Q, Kocevar VS, Yin DD, Thomas M. Effect of a concomitant diagnosis of  
585 allergic rhinitis on asthma-related health care use by adults. *Clin Exp Allergy.* 2005;35:  
586 282–287. doi:10.1111/j.1365-2222.2005.02182.x
- 587 20. Miller MK, Lee JH, Miller DP, Wenzel SE. Recent asthma exacerbations: A key predictor of  
588 future exacerbations. *Respir Med.* 2007;101: 481–489. doi:10.1016/j.rmed.2006.07.005
- 589 21. Guarnieri M, Balmes JR. Outdoor air pollution and asthma. *The Lancet.* 2014;383: 1581–  
590 1592. doi:10.1016/S0140-6736(14)60617-6
- 591 22. Weitzman M, Gortmaker S, Sobol A. Racial, social, and environmental risks for childhood  
592 asthma. *Am J Dis Child.* 1990;144: 1189–1194.  
593 doi:10.1001/archpedi.1990.02150350021016
- 594 23. Black PN, Udy AA, Brodie SM. Sensitivity to fungal allergens is a risk factor for life-  
595 threatening asthma. *Allergy.* 2000;55: 501–504. doi:10.1034/j.1398-9995.2000.00293.x
- 596 24. Gelber LE, Seltzer LH, Bouzoukis JK, Pollart SM, Chapman MD, Platts-Mills TAE.  
597 Sensitization and exposure to indoor allergens as risk factors for asthma among patients  
598 presenting to hospital. *Am Rev Respir Dis.* 1993;147: 573–578.  
599 doi:10.1164/ajrccm/147.3.573

- 600 25. Lovasi GS, O’Neil-Dunne JPM, Lu JWT, Sheehan D, Perzanowski MS, MacFaden SW, et al.  
601 Urban tree canopy and asthma, wheeze, rhinitis, and allergic sensitization to tree pollen in a  
602 New York City birth cohort. *Environ Health Perspect*. 2013;121: 494–500.  
603 doi:10.1289/ehp.1205513
- 604 26. Lovasi GS, Quinn JW, Neckerman KM, Perzanowski MS, Rundle A. Children living in areas  
605 with more street trees have lower prevalence of asthma. *J Epidemiol Community Health*.  
606 2008;62: 647–649. doi:10.1136/jech.2007.071894
- 607 27. Gold DR, Wright R. Population disparities in asthma. *Annu Rev Public Health*. 2005;26: 89–  
608 113. doi:10.1146/annurev.publhealth.26.021304.144528
- 609 28. Fecho K, Ahalt SC, Appold S, Arunachalam S, Pfaff E, Stillwell L, et al. Development and  
610 application of an open tool for sharing and analyzing integrated clinical and environmental  
611 exposures data: asthma use case. *JMIR Form Res*. 2022;6: e32357. doi:10.2196/32357
- 612 29. Beck AF, Huang B, Ryan PH, Sandel MT, Chen C, Kahn RS. Areas with high rates of police-  
613 reported violent crime have higher rates of childhood asthma morbidity. *J Pediatr*.  
614 2016;173: 175-182.e1. doi:10.1016/j.jpeds.2016.02.018
- 615 30. Rasmussen SG, Ogburn EL, McCormack M, Casey JA, Bandeen-Roche K, Mercer DG, et al.  
616 Association between unconventional natural gas development in the Marcellus Shale and  
617 asthma exacerbations. *JAMA Intern Med*. 2016;176: 1334–1343.  
618 doi:10.1001/jamainternmed.2016.2436
- 619 31. van Walraven C, Austin PC, Jennings A, Quan H, Forster AJ. A modification of the  
620 Elixhauser comorbidity measures into a point system for hospital death using administrative  
621 data. *Med Care*. 2009;47: 626. doi:10.1097/MLR.0b013e31819432e5
- 622 32. Christie C, Xie S, Diwadkar AR, Greenblatt RE, Rizaldi A, Himes BE. Consolidated  
623 Environmental and Social Data Facilitates Neighborhood-Level Health Studies in  
624 Philadelphia. *AMIA Annu Symp Proc*. 2022;2021: 305–313.
- 625 33. Cooper MJ, Martin RV, McLinden CA, Brook JR. Inferring ground-level nitrogen dioxide  
626 concentrations at fine spatial resolution applied to the TROPOMI satellite instrument.  
627 *Environ Res Lett*. 2020;15: 104013. doi:10.1088/1748-9326/aba3a5
- 628 34. van Donkelaar A, Hammer MS, Bindle L, Brauer M, Brook JR, Garay MJ, et al. Monthly  
629 global estimates of fine particulate matter and their uncertainty. *Environ Sci Technol*.  
630 2021;55: 15287–15300. doi:10.1021/acs.est.1c05309
- 631 35. US EPA. TRI basic data files: calendar years 1987-present. 3 Mar 2013 [cited 25 Jul 2023].  
632 Available: [https://www.epa.gov/toxics-release-inventory-tri-program/tri-basic-data-files-](https://www.epa.gov/toxics-release-inventory-tri-program/tri-basic-data-files-calendar-years-1987-present)  
633 [calendar-years-1987-present](https://www.epa.gov/toxics-release-inventory-tri-program/tri-basic-data-files-calendar-years-1987-present)
- 634 36. RMSTRAFFIC (Traffic Volumes). 2023 [cited 25 Jul 2023]. Available: [https://data-](https://data-pennshare.opendata.arcgis.com/datasets/rmstraffic-traffic-volumes/explore)  
635 [pennshare.opendata.arcgis.com/datasets/rmstraffic-traffic-volumes/explore](https://data-pennshare.opendata.arcgis.com/datasets/rmstraffic-traffic-volumes/explore)

- 636 37. Kind AJH, Buckingham WR. Making neighborhood-disadvantage metrics accessible — the  
637 neighborhood atlas. *N Engl J Med*. 2018;378: 2456–2458. doi:10.1056/NEJMp1802313
- 638 38. University of Wisconsin School of Medicine Public Health. 2018 Area Deprivation Index  
639 v3.1. Available: <https://www.neighborhoodatlas.medicine.wisc.edu/>. Accessed July 2022.
- 640 39. Licenses and Inspections code violations. In: OpenDataPhilly [Internet]. [cited 25 Jul 2023].  
641 Available: <https://opendataphilly.org/datasets/licenses-and-inspections-code-violations/>
- 642 40. Ermida SL, Soares P, Mantas V, Götttsche F-M, Trigo IF. Google Earth Engine open-source  
643 code for land surface temperature estimation from the Landsat series. *Remote Sens*.  
644 2020;12: 1471. doi:10.3390/rs12091471
- 645 41. R Core Team (2020). R: a language and environment for statistical computing. Vienna,  
646 Austria: R Foundation for Statistical Computing; Available: <https://www.R-project.org/>
- 647 42. Xie SJ, Kapos FP, Mooney SJ, Mooney S, Stephens KA, Chen C, et al. Geospatial divide in  
648 real-world EHR data: analytical workflow to assess regional biases and potential impact on  
649 health equity. *AMIA Summits Transl Sci Proc*. 2023;2023: 572–581.
- 650 43. Bai L, Bartell S, Bliss R, Vieira V. Mapping smoothed effect estimates from individual-level  
651 spatial data. 2022. Available: [https://search.r-](https://search.r-project.org/CRAN/refmans/MapGAM/html/MapGAM-package.html)  
652 [project.org/CRAN/refmans/MapGAM/html/MapGAM-package.html](https://search.r-project.org/CRAN/refmans/MapGAM/html/MapGAM-package.html)
- 653 44. Moorman JE, Akinbami LJ, Bailey CM, Zahran HS, King ME, Johnson CA, et al. National  
654 surveillance of asthma: United States, 2001-2010. *Vital Health Stat* 3. 2012; 1–58.
- 655 45. Greenblatt RE, Zhao EJ, Henrickson SE, Apter AJ, Hubbard RA, Himes BE. Factors  
656 associated with exacerbations among adults with asthma according to electronic health  
657 record data. *Asthma Res Pract*. 2019;5: 1. doi:10.1186/s40733-019-0048-y
- 658 46. Global Initiative for Asthma (GINA). Global strategy for asthma management and  
659 prevention (2019 update). Bethesda, MD: Global Initiative for Asthma (GINA); 2019.
- 660 47. Bryant-Stephens T, West C, Dirl C, Banks T, Briggs V, Rosenthal M. Asthma prevalence in  
661 philadelphia: description of two community-based methodologies to assess asthma  
662 prevalence in an inner-city population. *J Asthma*. 2012;49: 581–585.  
663 doi:10.3109/02770903.2012.690476
- 664 48. Zárata RebeccaA, Bhavnani D, Chambliss S, Hall EM, Zigler C, Cubbin C, et al.  
665 Neighborhood-level variability in asthma-related emergency department visits in Central  
666 Texas. *J Allergy Clin Immunol*. 2024;154: 933–939. doi:10.1016/j.jaci.2024.05.024
- 667 49. Grunwell JR, Opolka C, Mason C, Fitzpatrick AM. Geospatial analysis of social  
668 determinants of health identifies neighborhood hot spots associated with pediatric intensive  
669 care use for life-threatening asthma. *J Allergy Clin Immunol Pract*. 2022;10: 981-991.e1.  
670 doi:10.1016/j.jaip.2021.10.065

- 671 50. Harris KM. Mapping inequality: Childhood asthma and environmental injustice, a case study  
672 of St. Louis, Missouri. *Soc Sci Med.* 2019;230: 91–110.  
673 doi:10.1016/j.socscimed.2019.03.040
- 674 51. Corburn J, Osleeb J, Porter M. Urban asthma and the neighbourhood environment in New  
675 York City. *Health Place.* 2006;12: 167–179. doi:10.1016/j.healthplace.2004.11.002
- 676 52. Haselkorn T, Lee JH, Mink DR, Weiss ST. Racial disparities in asthma-related health  
677 outcomes in severe or difficult-to-treat asthma. *Ann Allergy Asthma Immunol.* 2008;101:  
678 256–263. doi:10.1016/S1081-1206(10)60490-5
- 679 53. Boudreaux ED, Emond SD, Clark S, Camargo CA. Acute asthma among adults presenting to  
680 the emergency department: the role of race/ethnicity and socioeconomic status. *Chest.*  
681 2003;124: 803–812. doi:10.1378/chest.124.3.803
- 682 54. Hiscock R, Bauld L, Amos A, Fidler JA, Munafò M. Socioeconomic status and smoking: a  
683 review. *Ann N Y Acad Sci.* 2012;1248: 107–123. doi:10.1111/j.1749-6632.2011.06202.x
- 684 55. Matthews KA, Gallo LC, Taylor SE. Are psychosocial factors mediators of socioeconomic  
685 status and health connections? *Ann N Y Acad Sci.* 2010;1186: 146–173. doi:10.1111/j.1749-  
686 6632.2009.05332.x
- 687 56. Wang Y, Beydoun MA. The obesity epidemic in the United States—gender, age,  
688 socioeconomic, racial/ethnic, and geographic characteristics: a systematic review and meta-  
689 regression analysis. *Epidemiol Rev.* 2007;29: 6–28. doi:10.1093/epirev/mxm007
- 690 57. Williams DR. Race, socioeconomic status, and health: the added effects of racism and  
691 discrimination. *Ann N Y Acad Sci.* 1999;896: 173–188. doi:10.1111/j.1749-  
692 6632.1999.tb08114.x
- 693 58. Charles CZ. The dynamics of racial residential segregation. *Annu Rev Sociol.* 2003;29: 167–  
694 207. doi:10.1146/annurev.soc.29.010202.100002
- 695

696 **Supporting information**

697 **S1 Text. Supplementary Methods.**

698 **S1 Figure. Flowchart of patient cohort selection.** Overview of steps followed to select final  
699 patient cohort (N = 6,656) from EHR data on all Penn Medicine patients with at least one asthma  
700 ICD code (N = 86,787).

701 **S2 Figure. Selection of study region using the spatial representation ratio (SRR).** (A) SRR  
702 values, defined as the cohort population residing in a block group divided by the underlying  
703 population as reported by the 2019 American Community Survey, for all of Philadelphia and for  
704 the selected study region (inset box). SRR = 1 indicates no representativeness bias. Density plots  
705 of the study cohort (B) before and (C) after filtering for the study region. Base maps were created  
706 using the Stamen Design from Stadia Maps.

707 **S3 Figure. Spatial distribution of SEDH datasets that were integrated with EHR data.**

708 The following maps are shown for the spatial area which comprised our study region: (A) raster  
709 of NO<sub>2</sub> pollution levels, (B) raster of PM<sub>2.5</sub> pollution levels, (C) point sites of toxic releases and  
710 the total summed emissions at each site, (D) line segments of roadways and the daily vehicle  
711 miles traveled (DVDT) on each, (E) housing violations per block group, normalized by the  
712 underlying 2019 American Community Survey population, (F) raster of the normalized  
713 difference vegetation index (NDVI). A map of area deprivation index (ADI), which most  
714 strongly reduced the spatial variance of odds of exacerbation risk in our spatial GAMs, is shown  
715 in Figure 3A. Base maps were created using the Stamen Design from Stadia Maps.

716 **S4 Figure. Pairwise correlation between all EHR and SEDH variables.** Measures in each box  
717 correspond to Pearson's correlation coefficients. For nominal categorical variables, reference  
718 levels are as follows: White (race), Private (health insurance type).

719 **S5 Figure. Influence of individual EHR and SEDH variables on the odds ratio (OR) of the**  
720 **unadjusted spatial GAM.** Percent reduction in the variance of ORs across the study region for  
721 one-variable-at-a-time adjusted spatial GAMs compared to the unadjusted model. OR changes  
722 for models adjusted one variable at a time (in addition to years followed) are shown in blue.  
723 Multivariable models (both EHR-adjusted and EHR & SEDH-adjusted) are shown in red for  
724 comparison.

725 **S6 Figure. Spatial GAMs adjusted one-at-a-time for the EHR-derived variables that did**  
726 **not greatly reduce variance.** Spatial odds ratios (ORs) of exacerbation are shown after  
727 adjusting for years followed and one-at-a-time for the following variables whose percent  
728 reduction in variance of ORs was less than 25: (A) age, (B) sex, (C) ethnicity, (D) BMI, (E)  
729 smoking status, (F) COPD, (G) allergic rhinitis, (H) Elixhauser comorbidity score, (I) ICS. Base  
730 maps were created using the Stamen Design from Stadia Maps.

731 **S7 Figure. Spatial GAMs adjusted one-at-a-time for the SEDH variables that did not**  
732 **greatly reduce variance.** Spatial odds ratios (ORs) of exacerbation are shown after adjusting for  
733 years followed and one-at-a-time for the following variables whose reduction in variance of ORs  
734 was less than 25: (A) NO<sub>2</sub>, (B) PM<sub>2.5</sub>, (C) toxic releases exposure, (D) vehicular traffic, (E)  
735 housing violations, (F) normalized difference vegetation index (NDVI). Base maps were created  
736 using the Stamen Design from Stadia Maps.

737 **S8 Figure. Spatial odds ratios (ORs) of exacerbations among White patients along with the**  
738 **effects of ADI and health insurance type on this distribution.** (A) SRR values for the updated  
739 study region used in spatial GAMs for patients of White race only (SRR = 1 indicates no  
740 representativeness bias). (B) Unadjusted spatial GAM adjusted only for years followed for  
741 patients of White race (N = 1,383). Spatial GAMs adjusted additionally for (C) area deprivation

742 index (ADI) and (D) health insurance type. Base maps were created using the Stamen Design  
743 from Stadia Maps.

744 **S1 Table. Generic medication names included in medication classes.** The following generic  
745 drug names recorded in the EHR during the study period were used for asthma and exacerbation  
746 phenotyping as well as used as independent variables in select models (i.e., ICS). Instances in  
747 which these drugs were listed as investigational or nasal formulations were not included.

748 **S2 Table. Sources and spatiotemporal dimensions of geospatial datasets merged with EHR**  
749 **data.**

750 **S3 Table. Asthma-related housing code violations extracted from the Philadelphia**  
751 **Department of Licenses and Inspections.**

752 **S4 Table. Patient medications by exacerbation count levels.** Shown are the number and  
753 percentage of patients receiving each of the medication types listed according to their number of  
754 exacerbations during the study period.

755 **S5 Table. Characteristics of complete cases and patients excluded due to missingness.**  
756 Shown are the number and percentage of patients in each level for categorical variables and the  
757 Median and Interquartile Range (IQR) for the Years followed variable in complete cases versus  
758 those excluded due to missingness in the sex, ethnicity, health insurance type, BMI, and smoking  
759 status variables.

760 **S6 Table. Adjusted Generalized Variance Inflation Factors (GVIFs) for each EHR and**  
761 **SEDH variable included in the EHR & SEDH-adjusted negative binomial and logistic**  
762 **regression models.**

763 **S7 Table. Individual-level asthma exacerbation risk factors in multivariable negative**  
764 **binomial regression models.** Shown are the adjusted incidence rate ratios (IRRs), 95%



765 confidence intervals (CIs), and p-values for negative binomial models of asthma exacerbations as  
766 a count outcome adjusted for EHR-derived variables only and for both EHR-derived and SEDH  
767 variables.

768 **S8 Table. Spatial GAMs of asthma exacerbations adjusted for individual risk factors that**

769 **most changed risk.** Shown are the adjusted odds ratios (ORs), 95% confidence intervals (CIs),

770 and p-values for spatial GAMs of asthma exacerbations as a dichotomous outcome adjusted for

771 years followed and one-at-a-time for ADI, race, and health insurance type, the three variables

772 whose percent reduction in variance of ORs was greater than 25.



# Linking EHR with SEDH data

Electronic Health Records  
(N = 86,787)

SEDH Datasets

Jan 1, 2017 — Dec 31, 2020

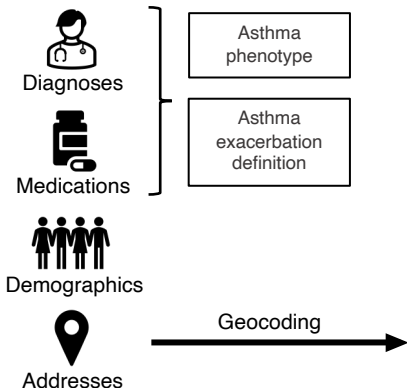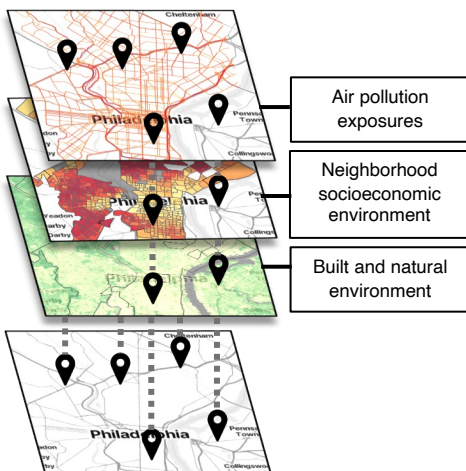

## Cohort selection

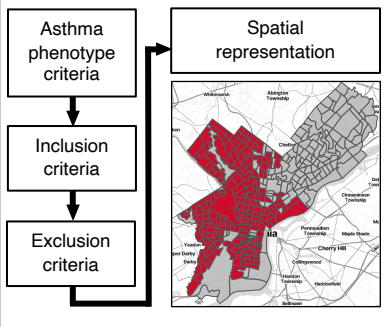

## Analysis of expanded EHR

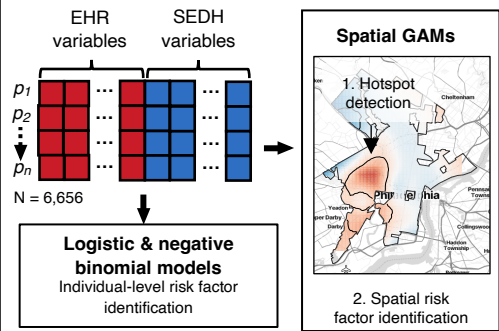

Figure 1

(A) Univariable

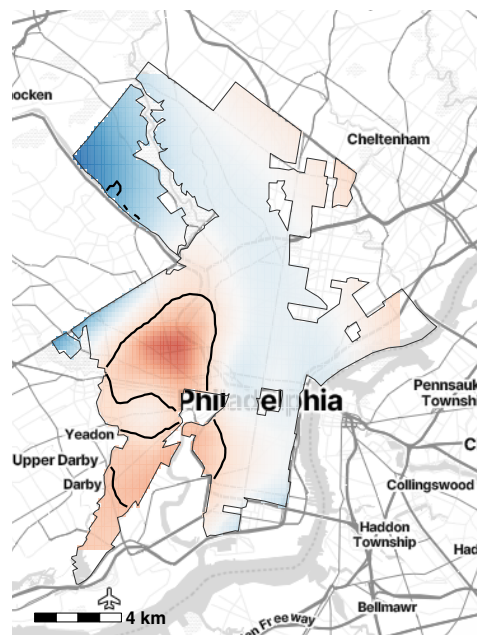

(B) EHR-adjusted

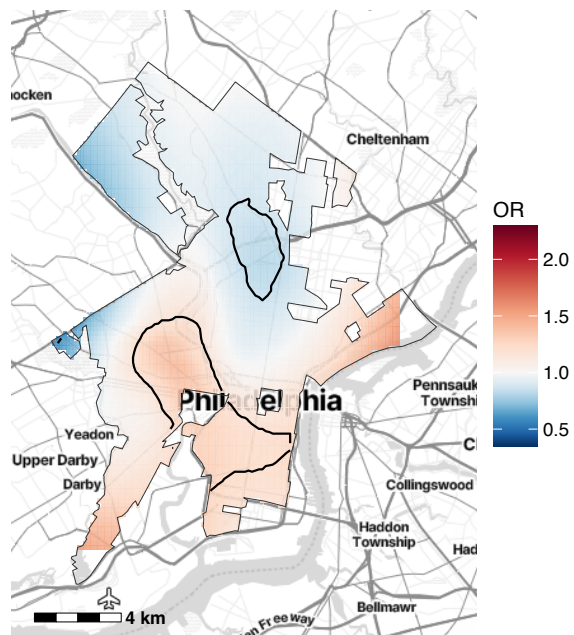

(C) EHR & SEDH-adjusted

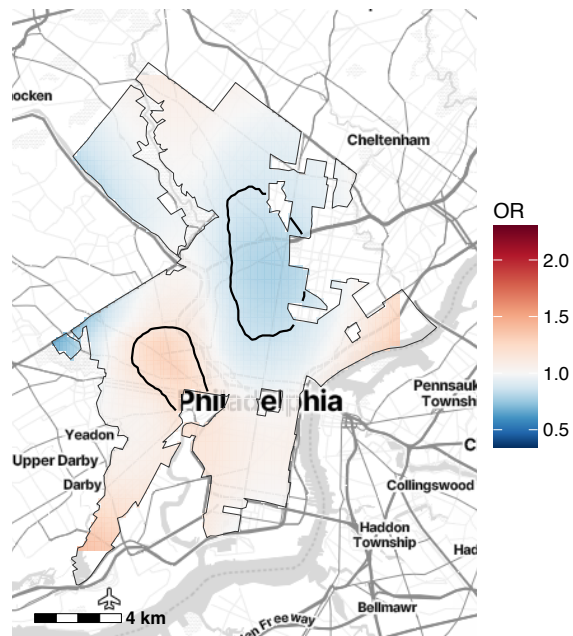

Figure 2

(A) ADI distribution

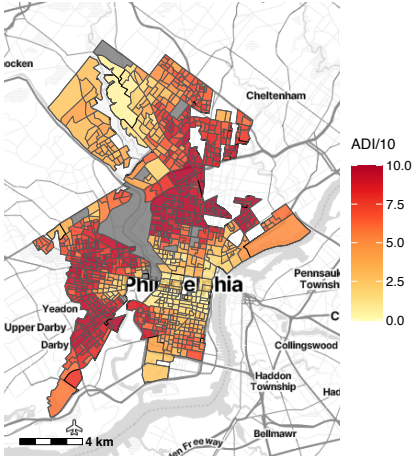

(D) ADI-adjusted GAM

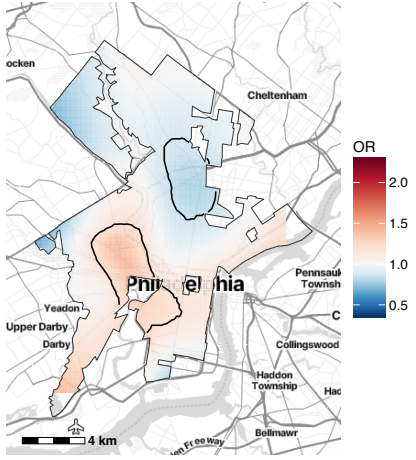

(B) Race distribution

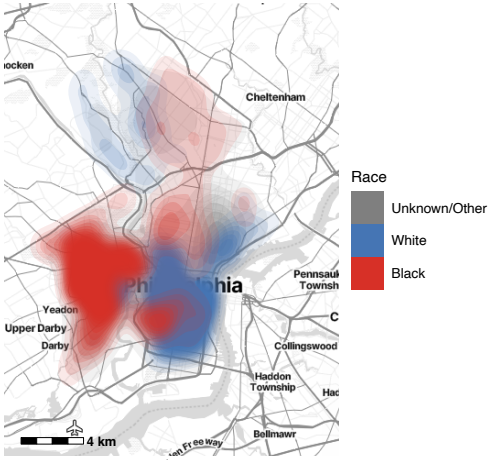

(E) Race-adjusted GAM

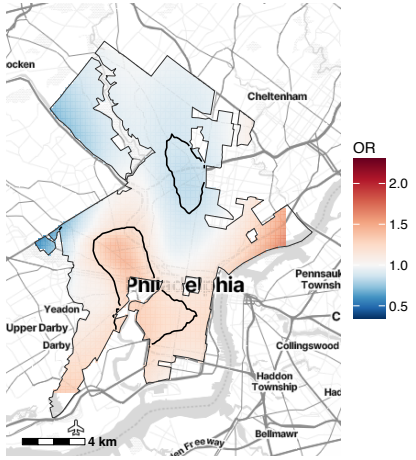

(C) Health insurance type distribution

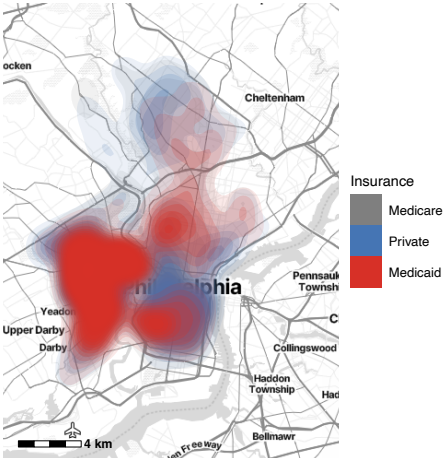

(F) Health insurance type-adjusted GAM

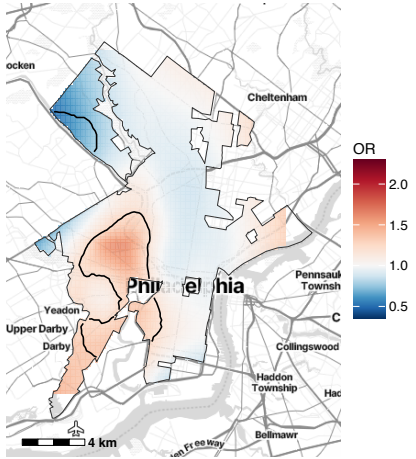

Figure 3

(A) Stratified SRR selection

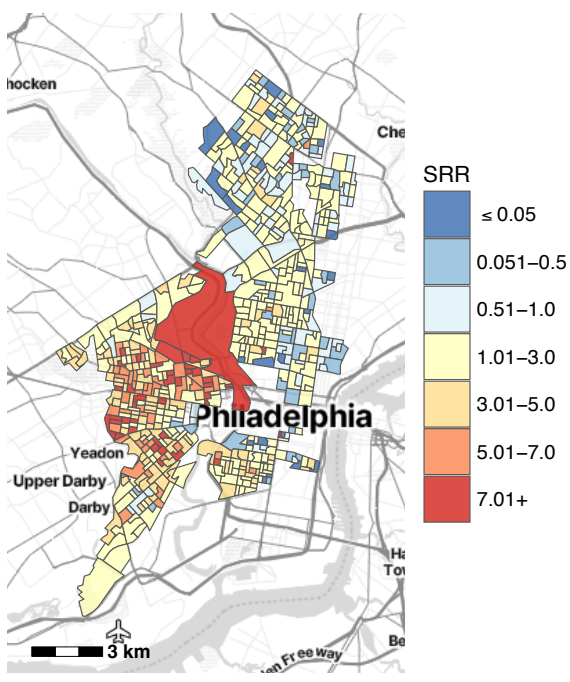

(B) Univariable GAM

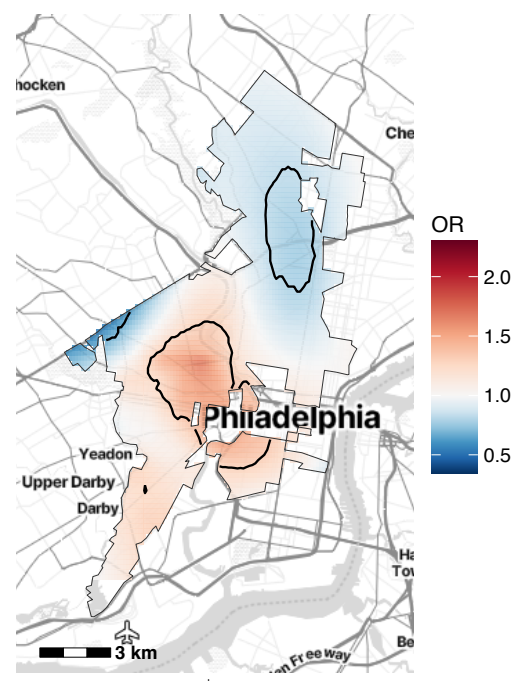

(C) ADI-adjusted GAM

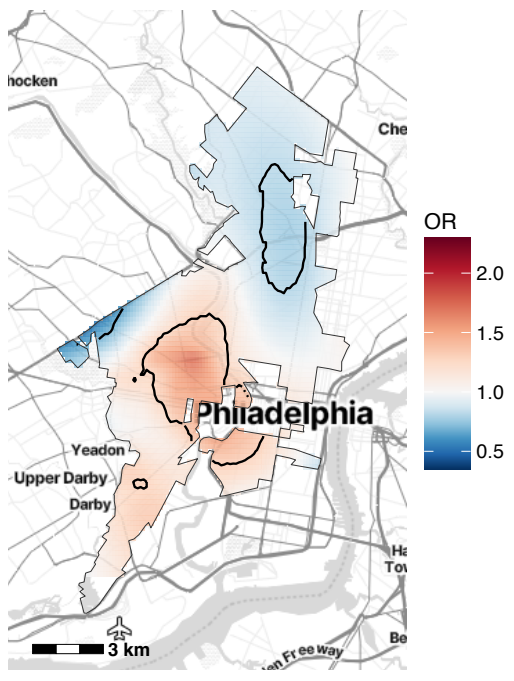

(D) Health insurance type-adjusted GAM

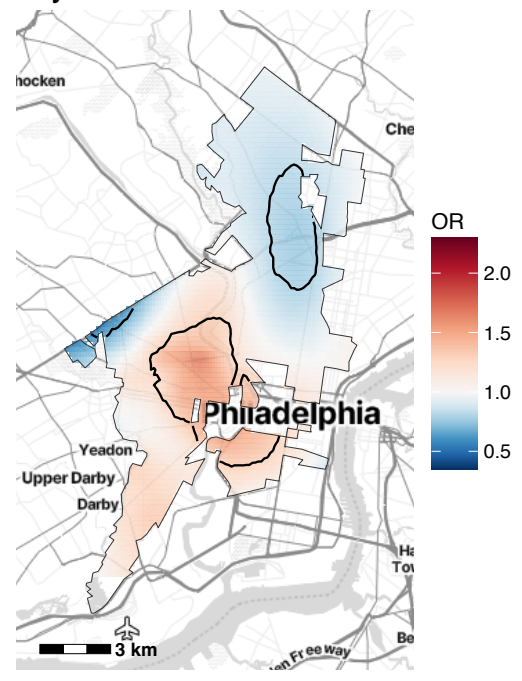

Figure 4
